# Supplementary material for: Community-generated solutions to cancer inequity: recommendations from transgender, non-binary and intersex people on improving cancer screening and care
Source: HighWire-hosted journal article supplement (doi:10.1136/bmjonc-2022-000014), 2023-06-01
Supplement: bmjonc-2022-000014supp006_data_supplement.pdf [file bmjonc-2022-000014supp006_data_supplement.pdf]

*Online FGD guide: Transgender and nonbinary participants, Spanish-language*

**Supplemental file 6: Spanish: Online focus group discussion guide for transgender, nonbinary, gender-expansive, and intersex participants**

***FGD Facilitator: Explain discussion purpose and guidelines***

La participación en esta discusión grupal en línea tomará aproximadamente 30 minutos por día durante cuatro días, 2 horas en total. Cada día durante los cuatro días, iniciará sesión en este sitio web. Cada día publicaremos un nuevo conjunto de preguntas relacionadas con su identidad de género, su cuerpo, sus experiencias de atención médica y sus reacciones a un nuevo conjunto de preguntas sobre los órganos corporales que pueda tener. Cada día, puede responder a las preguntas de ese día, así como agregar a sus respuestas de días anteriores y responder a las respuestas de otros participantes. Le facilitador también puede hacerle preguntas de seguimiento basadas en las respuestas del día anterior. Puede responder a estas preguntas de seguimiento la próxima vez que inicie sesión.

El tercer día de esta discusión en línea, le mostraremos un nuevo conjunto de preguntas llamado "inventario de órganos": este es un formulario que los pacientes y el personal médico pueden usar para identificar qué partes del cuerpo tiene un paciente que podrían ser importantes al recibir atención médica. Esperamos conocer sus opiniones sobre el contenido del inventario de órganos, cómo podemos mejorarlo y cuándo y cómo se podrían utilizar las preguntas.

No hay respuestas correctas o incorrectas en esta discusión. No dude en compartir sus opiniones y reacciones con honestidad y libertad. Estamos interesadas en escuchar su punto de vista incluso si es diferente de lo que otros podrían expresar, o incluso si no está segura o se siente en conflicto acerca de su (s) opinión (es) en el formulario o las preguntas que le hacemos. Puede omitir cualquier pregunta que no desee responder.

***Privacy/confidentiality information***

Las respuestas escritas durante esta discusión de grupo focal se guardarán y compartirán con los investigadores. Para proteger su privacidad, solo usaremos el nombre de alias que elija proporcionar. El único nombre que verán los demás participantes en la discusión del grupo focal será este nombre de alias que usted elija proporcionar. Ellos no sabrán nada más sobre ti, aparte de lo que elijas compartir.

Recuerde que no es necesario que responda a ninguna pregunta con la que se sienta incómoda y que puede abandonar el grupo focal en cualquier momento.

Además, es importante que esta discusión sea privada; por favor no discuta ni comparta información de esta conversación con otros. Recuerde cerrar la ventana de su navegador después de enviar sus respuestas para evitar que alguien vea sus respuestas.

Cuando mencione a personas que conoce, no use sus nombres.

Si tiene alguna pregunta sobre el estudio, las preguntas o sus derechos como participante en esta investigación, puede comunicarse con Profesora Anu Manchikanti Gómez al 510-642-0722 o [anugomez@berkeley.edu](mailto:anugomez@berkeley.edu).

**I. 1r Día: Conceptualizaciones de la identidad de género**

Gracias nuevamente por aceptar participar en esta discusión. Para comenzar, me gustaría aprender un poco sobre sus pensamientos y opiniones sobre el género en general y sobre su propia identidad de género.

*Online FGD guide: Transgender and nonbinary participants, Spanish-language*

1. ¿Hay palabras específicas o lenguaje que usa para describir su propia identidad de género?
  - a. ¿Existen circunstancias o situaciones en las que esto cambie? Si es así, ¿puede contarnos sobre eso?
2. ¿Por cuánto tiempo se ha identificado de esta forma?
3. ¿Con qué frecuencia la gente le percibe con esta identidad de género?
4. ¿En qué situaciones elige compartir esta información?
5. ¿En qué situaciones cree que no tiene opción a compartir o no compartir esta información?
6. ¿Qué le parece importante compartir sobre su identidad de género para que entendamos lo que significa para usted?
7. ¿Qué significa para usted la frase sexo asignado al nacer? ¿Hay palabras o lenguaje específico que usa para describir su sexo asignado al nacer?
  - a. ¿Existen circunstancias o situaciones en las que esto cambie? Si es así, ¿puede contarnos sobre eso?
  - b. Como persona transgénero, de género expansivo, no binario, de género expansivo y / o intersexual, ¿qué tan bien cree que el sexo asignado al nacer captura información importante sobre su identidad o necesidades de atención médica?
8. ¿En qué espacios eliges compartir información sobre tu sexo asignado al nacer?
9. ¿En qué espacios cree que no tiene opción a compartir o no compartir esta información?
10. En la breve encuesta que completó para este grupo de enfoque, le hicimos las siguientes dos preguntas sobre género:

Si tuviera que elegir de la lista a continuación, aunque reconocemos que estas categorías pueden no ser ideales, ¿cuál de las siguientes describe mejor su género actual? (Seleccione todas las que correspondan)

- Agénero (sin género)
- Genderqueer
- Hombre
- No binario
- Two-Spirit (puede incluir el idioma específico de su tribu para su identidad, si lo desea) \_\_\_\_\_
- Mujer
- Categoría de género adicional, especifique: \_\_\_\_\_
- Prefiero no responder

¿Se identifica como transgénero y / o se considera una persona de experiencia transgénero?

- Sí
- No
- No lo sé
- Prefiero no responder

*Online FGD guide: Transgender and nonbinary participants, Spanish-language*

¿Qué opina de la redacción de la pregunta de la lista de género?

- a. ¿Qué opina de la opción de "seleccione todas las que correspondan", frente a la opción de seleccionar solo una?
- b. ¿Cómo afectaría su respuesta al poder seleccionar solo una frente a todas las que correspondan?
- c. ¿Cómo se siente acerca de las opciones de género enumeradas?

11. ¿Qué opina de la pregunta sobre ser transgénero?

- a. ¿Cómo cambiaría la redacción, si es que la cambiaría?

12. ¿Cómo se siente al que se le haga la pregunta sobre la experiencia transgénero por separado, en lugar de incluir "transgénero" como una opción de género en la pregunta de la lista de género de opción múltiple?

13. Después de preguntarle sobre el género, le preguntamos si es o se identifica como intersexual. Específicamente, preguntamos: ¿Se identifica como intersexual?

- No
- Sí
- Prefiero no responder

Seguido por: ¿Alguna vez un proveedor de atención médica le ha dicho que es intersexual o que tiene lo que a veces se denomina "diferencia en el desarrollo sexual" o "trastorno del desarrollo sexual" (TDS)?

- No
- Sí
- No sé
- Prefiero no responder

¿Cómo se siente acerca de estas dos preguntas formuladas juntas? ¿Prefieres una más que otra?  
¿Por qué o por qué no?

- a. ¿Cómo podría mejorar la (s) pregunta (s)?

## II. 2do Día: Experiencias y divulgación de atención médica

**Ahora nos gustaría hacerle algunas preguntas sobre sus experiencias en un entorno de atención médica.**

14. ¿Conocen sus proveedores de atención médica su género? (Aka, ¿está "fuera" con sus proveedores acerca de su género?)

15. ¿Cómo se ve y se siente el apoyo para usted como persona TGE en un entorno de atención médica?

*Online FGD guide: Transgender and nonbinary participants, Spanish-language*

16. ¿Cómo se ve y se siente no tener apoyo como persona TGE dentro de un entorno de atención médica?
17. ¿Cómo maneja o supera las barreras de la atención?
18. ¿Cómo ve a otras personas TGE manejar o superar estas barreras para la atención?
19. ¿Ha compartido su proveedor con usted sus calificaciones para trabajar con las personas TGE?
20. ¿Alguno de sus proveedores ha hablado con usted sobre el riesgo de cáncer, las pruebas de detección o el tratamiento? Si es así, ¿quién suele mencionar el tema?
21. ¿Qué tan cómodo se siente al tener estas conversaciones con su proveedor?
22. ¿Un proveedor no ha podido responder sus preguntas sobre el riesgo de cáncer, las pruebas de detección o el tratamiento relacionado con las personas TGE?
23. ¿Cuáles son las características más importantes de un proceso de admisión médica para usted y las personas TGE que conoce?
  - a. ¿Qué características deben EVITARSE en un proceso de admisión médica para usted?
24. ¿Ha cambiado su identidad como persona TGE su relación con la divulgación de su historial médico a sus proveedores de atención médica a través del tiempo?
25. ¿Los formularios de admisión en el consultorio de su proveedor de atención médica se sienten como si tuvieran un lenguaje apropiado y preciso sobre su identidad, cuerpo y comportamientos?
26. ¿Tiene alguna recomendación para crear formularios médicos que reflejen su género, cuerpo y comportamientos?
27. Si necesitara un examen de detección o atención médica, ¿cómo determinaría una preferencia por una clínica o un proveedor específico?
28. Si necesitara un examen de detección o atención médica, ¿cómo determinaría una preferencia por un procedimiento específico? ¿Le preguntaría a su proveedor o amigos?
29. ¿Qué tipo de información le gustaría que su proveedor supiera antes de comenzar esta conversación?
30. ¿Qué tan informados han estado los proveedores de atención médica que ha visto sobre el cuidado de las personas TGE?
  - a. Si no tan informados, ¿ha recibido apoyo con referencias para acceder a la atención adecuada para usted?
31. ¿Qué impacto (si lo hay) tienen las actitudes de los proveedores en su deseo de buscar atención médica?

*Online FGD guide: Transgender and nonbinary participants, Spanish-language*

### III. 3r Día: Revisión del inventario

Tómese los próximos cinco minutos para leer este formulario. Responda a la siguiente serie de preguntas cuando haya terminado de revisar el formulario.

#### FORMULARIO DE INVENTARIO DE ÓRGANOS

Para asegurarnos de que se le realice un examen de detección apropiado para su cuerpo y su experiencia, le preguntamos a TODAS las personas (independientemente del género o sexo asignado al nacer) sobre qué partes del cuerpo tiene actualmente. Para cada parte del cuerpo, comenzamos usando el término médico, aunque sabemos que estos términos pueden no ser las palabras que usa para su cuerpo. Podrá escribir las palabras que usa para estas partes del cuerpo en una pregunta posterior. Sin embargo, en aras de la claridad, utilizamos los términos médicos como punto de partida.

De la siguiente lista de partes del cuerpo, marque la casilla junto a cualquier parte del cuerpo que tenga ACTUALMENTE. Para los órganos que vienen en pares, seleccione la casilla si tiene CUALQUIER tejido de ese órgano. **SELECCIONE TODAS LAS QUE CORRESPONDAN.**

- Senos o tejido mamario**  
Los **senos** son órganos blandos en el pecho de adolescentes y adultos.
- Colon**  
El **colon** es un órgano en la zona inferior del torso que ayuda con la absorción de alimentos. La parte más larga del intestino grueso.
- Útero**  
El **útero** es un órgano que se encuentra en el área pélvica. El sangrado mensual proviene del útero y es donde crece el embarazo.
- Ovarios**  
Los **ovarios** son órganos que producen óvulos humanos y también hormonas. Suelen haber dos de ellos y se encuentran en la región pélvica del cuerpo.
- Trompas de Falopio**  
Las **trompas de Falopio** conectan los ovarios al útero.
- Cuello uterino**  
El **cuello uterino** es la abertura del útero, en la parte posterior de la vagina.
- Próstata**  
La **próstata** es una glándula dentro del cuerpo, debajo de la vejiga y entre el recto y la uretra en la base del pene.
- Pene**  
El **pene** es un falo que es una parte del cuerpo cerca de la ingle, utilizado por algunas personas para la actividad sexual y también por algunas personas para soltar orina y esperma del cuerpo.
- Vagina**  
La **vagina** es una abertura genital frontal, utilizada por algunas personas para la actividad sexual y también por algunas personas para soltar sangre menstrual o dar a luz.
- Testículos**

*Online FGD guide: Transgender and nonbinary participants, Spanish-language*

Los testículos (también llamados **testes**) son glándulas reproductoras que se encuentran fuera del cuerpo y están contenidas dentro del escroto. Por lo general, hay dos y producen espermatozoides y andrógenos.

- Ano**  
El **ano** es la abertura a través de la cual los desechos sólidos salen del cuerpo, también utilizada por algunas personas para la actividad sexual.
- Ninguna de las anteriores**
- Prefiero no responder**
- No dude en compartir información adicional sobre los órganos que tiene ahora o que solía tener, que podría ser importante que sus proveedores de atención médica la sepan. \_\_\_\_\_  
\_\_\_\_\_  
\_\_\_\_\_

Si marcó pene, vagina o testículos en la lista anterior, marque la opción a continuación que se aplique a usted. Comprender qué cirugías puede haber tenido y / o qué terapia hormonal ha utilizado puede ayudar a su proveedor a determinar qué exámenes de salud recomiendan. **SELECCIONE TODAS LAS QUE CORRESPONDAN.**

¿Nació con esta vagina o se desarrolló mediante cirugía y / o terapia hormonal de afirmación de género (THAG) / terapia de reemplazo hormonal (TRH)?

- Nací con una vagina
- Cirugía
- GAHT/TRH
- No tengo este órgano
- Prefiero no responder

¿Nació con este pene o se desarrolló mediante cirugía y / o terapia hormonal de afirmación de género (THAG) / terapia de reemplazo hormonal (TRH)?

- Nací con una vagina
- Cirugía
- GAHT/TRH
- No tengo este órgano
- Prefiero no responder

¿Nació con testículos o se desarrollaron mediante cirugía y / o terapia hormonal de afirmación de género (THAG) / terapia de reemplazo hormonal (TRH)?

- Nací con una vagina
- Cirugía
- GAHT/TRH
- No tengo este órgano
- Prefiero no responder

*Online FGD guide: Transgender and nonbinary participants, Spanish-language*

¿Ha tenido alguna de las siguientes cirugías? Le preguntamos sobre su historial de cirugía porque puede ayudar a su proveedor a decidir qué tipo de examen de salud recomienda. **SELECCIONE TODAS LAS QUE CORRESPONDAN.**

**Mastectomía**

Una mastectomía es una cirugía para extirpar todo el tejido mamario de una mama como una forma de tratar o prevenir el cáncer de mama. Una mastectomía puede involucrar uno o ambos senos.

**Top surgery**

Procedimiento quirúrgico para extraer tejido mamario. También se llama cirugía de tórax masculinizante. La cirugía superior implica más que una mastectomía para el tratamiento del cáncer de mama. Se pueden usar técnicas especiales para contornear y reducir la pared torácica, colocar los pezones y la areola y minimizar las cicatrices.

32. ¿Qué pensó cuando leyó el formulario por primera vez?

*Probe:*

- ¿Cómo se sintió?
- ¿Qué te gustó? ¿Qué no te gustó?
- ¿Qué te sorprendió?
- Otros comentarios:

33. ¿Cómo se sintió leer las opciones de este formulario?

*Probe:*

- ¿Cálido? ¿Frío? ¿Médico? ¿Personal?
- ¿Qué te pareció difícil de entender?
- ¿Qué se sintió fácil de entender?
- Otros comentarios:

34. ¿Qué información fue relevante o no relevante para su género, cuerpo o experiencia?

*Probe:*

- ¿Por qué por qué no?
- ¿Qué información fue la más importante?
- ¿Qué información faltaba?
- Otros comentarios:

35. ¿Qué tan fácil o difícil fue averiguar cómo llenar este formulario?

36. ¿A quién cree que va dirigido este formulario? ¿Por qué?

37. ¿Cómo cree que un proveedor de atención médica debería usar este formulario? ¿Cuándo (si alguna vez) cree que es apropiado que un proveedor de atención médica use este formulario?

38. Después de que los participantes respondan al inventario de órganos, les daremos la opción de decirle a su proveedor qué lenguaje usar para hablar sobre su cuerpo. Vea a continuación un ejemplo.

¿Le gustaría decirle a su proveedor qué lenguaje usar para describir las partes de su cuerpo?

- Sí  
 No → Saltar al final

*Online FGD guide: Transgender and nonbinary participants, Spanish-language*

En caso afirmativo, marque la casilla junto a la casilla que se aplica a su experiencia. Al responder a estas preguntas, considere qué términos podría utilizar al hablar con su proveedor en el ámbito médico.

¿Usa la palabra "senos"?

- Sí, uso la palabra “senos.”
- No, uso otra palabra. La palabra que uso en vez de “senos” es: \_\_\_\_\_
- Prefiero no responder

¿Usa la palabra "cuello uterino"?

- Sí, uso la palabra “cuello uterino.”
- No, uso otra palabra. La palabra que uso en vez de “cuello uterino” es: \_\_\_\_\_
- Prefiero no responder

¿Usa la palabra "trompas de Falopio"?

- Sí, uso la palabra “trompas de Falopio.”
- No, uso otra palabra. La palabra que uso en vez de “Trompas de Falopio” es: \_\_\_\_\_
- Prefiero no responder

¿Usa la palabra "ovarios"?

- Sí, uso la palabra “ovarios.”
- No, uso otra palabra. La palabra que uso en vez de “ovarios” es: \_\_\_\_\_
- Prefiero no responder

¿Usa la palabra "pene"?

- Sí, uso la palabra “pene.”
- No, uso otra palabra. La palabra que uso en vez de “pene” es: \_\_\_\_\_
- Prefiero no responder

¿Usa la palabra "próstata"?

- Sí, uso la palabra “próstata.”
- No, uso otra palabra. La palabra que uso en vez de “próstata” es: \_\_\_\_\_
- Prefiero no responder

¿Usa la palabra "testículos"?

- Sí, uso la palabra “testículos.”
- No, uso otra palabra. La palabra que uso en vez de “testículos” es: \_\_\_\_\_
- Prefiero no responder

¿Usa la palabra "útero"?

- Sí, uso la palabra “útero.”
- No, uso otra palabra. La palabra que uso en vez de “útero” es: \_\_\_\_\_
- Prefiero no responder



*Online FGD guide: Transgender and nonbinary participants, Spanish-language*

¿Usa la palabra "vagina"?

- Sí, uso la palabra “vagina.”
- No, uso otra palabra. La palabra que uso en vez de “vagina” es: \_\_\_\_\_
- Prefiero no responder

¿Usa la palabra "colon"?

- Sí, uso la palabra “colon.”
- No, uso otra palabra. La palabra que uso en vez de “colon” es: \_\_\_\_\_
- Prefiero no responder

¿Usa la palabra "ano"?

- Sí, uso la palabra “ano.”
- No, uso otra palabra. La palabra que uso en vez de “ano” es: \_\_\_\_\_
- Prefiero no responder

39. ¿Cuál es su reacción a esta opción de compartir las palabras que usa para hablar sobre su propio cuerpo?
40. ¿Para qué podría usarse esta información sobre el uso de palabras?
41. ¿Tiene alguna inquietud sobre cómo se podría utilizar esta información?
42. ¿Alguna recomendación para mejorar la forma en que preguntamos a las personas sobre las palabras que usan para estas partes del cuerpo?
- a. ¿Cómo se sentiría si agregáramos una opción de respuesta para cada término que diga “Preferiría no hablar de esta parte del cuerpo con un proveedor”?

#### **IV. 4o Día: Recomendaciones**

**Nos interesan sus opiniones sobre las recomendaciones para mejorar este formulario.**

43. ¿Quién cree que se beneficiaría más al utilizar este formulario? ¿Por qué?
44. ¿Quién se beneficiaría menos? ¿Por qué?
45. ¿Qué se podría mejorar?
46. ¿Hay situaciones o entornos en los que no se deba utilizar este formulario? ¿Cuáles son las posibles alternativas que podrían utilizarse en esa situación o entorno?
47. ¿Tiene alguna otra idea que le gustaría compartir y que podría ayudarnos a pensar en los cambios en el formulario?
48. ¿Hay algo que cree que sería importante que el equipo de investigación supiera que no le hayamos preguntado?

*Online FGD guide: Transgender and nonbinary participants, Spanish-language*

49. ¡Muchas gracias por su participación en este estudio! Para poder enviarle la tarjeta de regalo de Amazon de \$ 75 como agradecimiento por participar, necesitaremos recopilar su información de contacto. Si desea recibir una tarjeta de regalo de Amazon de \$ 75 como agradecimiento por participar, seleccione "sí" a continuación.
- SÍ, me gustaría recibir una tarjeta de regalo de \$ 75
  - NO, no quiero una tarjeta regalo
50. Para una encuesta en línea de ~ 15 minutos, ¿sería más probable que participara si se le ofreciera participación?:
- Un sorteo para ganar una tarjeta de regalo de \$ 50 (tendría una probabilidad de 1 en 10 de ganar)
  - Una tarjeta de regalo de \$ 5 garantizada
  - Es igualmente probable que participe con cualquier opción
  - No lo sé
51. A continuación, nos gustaría que eligiera un código de acceso de cuatro dígitos. Elija un número que pueda recordar fácilmente. Después de ingresar su contraseña y hacer clic en el botón SIGUIENTE, será dirigido a otro sitio web para completar un formulario con su contraseña e información de contacto. Al ingresar esta información en una encuesta separada, podemos asegurarnos de que su nombre e información de contacto no estén directamente relacionados con sus respuestas a las preguntas de esta encuesta. **Si no desea ingresar su información, puede cerrar su navegador ahora para proteger su privacidad.**
- 

**FIN DE LA DISCUSIÓN DE GRUPO FOCAL**

***NEW SURVEY FOR INCENTIVE DISTRIBUTION***

---

Gracias por participar en un estudio de investigación con la Universidad de California, Berkeley e Ibis Reproductive Health. Por favor, responda las siguientes preguntas para que podamos enviarle la tarjeta de regalo de Amazon de \$ 75 como agradecimiento por participar. Al ingresar esta información en una encuesta separada, podemos asegurarnos de que su nombre e información de contacto no estén directamente relacionados con sus respuestas a las preguntas de esta encuesta. **Si no desea ingresar su información, puede cerrar su navegador ahora para proteger su privacidad.**

1. Ingrese su contraseña de cuatro dígitos.  

---
2. ¿Le gustaría que le enviemos por correo electrónico una tarjeta de regalo de Amazon de \$ 75 o le enviemos un mensaje de texto con una tarjeta de regalo de Amazon de \$ 75?
  - CORREO ELECTRÓNICO: me gustaría recibir una tarjeta de regalo de \$ 75 por correo electrónico

*Online FGD guide: Transgender and nonbinary participants, Spanish-language*

- TELÉFONO: me gustaría recibir una tarjeta de regalo de \$ 75 por mensaje de texto
3. [Si selecciona "correo electrónico" arriba →] Proporcione la dirección de correo electrónico a la que le gustaría que le enviemos su tarjeta de regalo:  
\_\_\_\_\_
4. [Si selecciona "teléfono" arriba →] Proporcione el número de teléfono al que le gustaría que le enviemos su tarjeta de regalo:  
\_\_\_\_\_
5. ¿Le gustaría que le enviemos los resultados de este estudio (una hoja informativa, preguntas frecuentes u otro tipo de resumen) por correo electrónico?
- Sí, envíeme un correo electrónico con los resultados a esta dirección de correo electrónico: \_\_\_\_\_
- No, no quiero que me envíen los resultados.

¡Gracias por participar! Enviaremos su tarjeta de regalo de Amazon al correo electrónico o al número de teléfono que nos proporcionó. Si no recibe su tarjeta en dos semanas, comuníquese con la líder de la investigación, Profesora Anu Manchikanti Gómez al 510-642-0722 o anugomez@berkeley.edu.

Haga clic en la flecha para enviar su información. Cierre su navegador después de enviar sus respuestas.

**FIN DE LA ENCUESTA DE INCENTIVOS**
